# Supplementary material for: Proteomic analysis of a drosophila IBMPFD model reveals potential pathogenic mechanisms
Source: Royal Society of Chemistry journal article supplement (doi:10.1039/c2mb25037c), 2012-03-14
Supplement: c2mb25037c.pdf [file c2mb25037c.pdf]

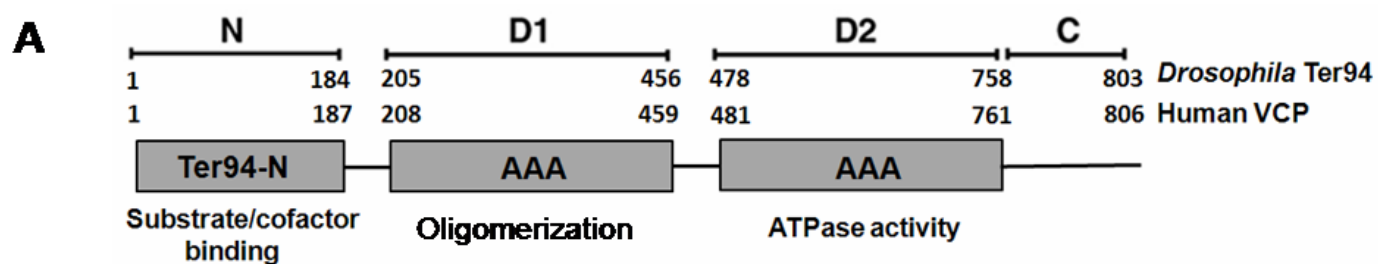

**B**

p97 N  
p97 D1  
p97 D2

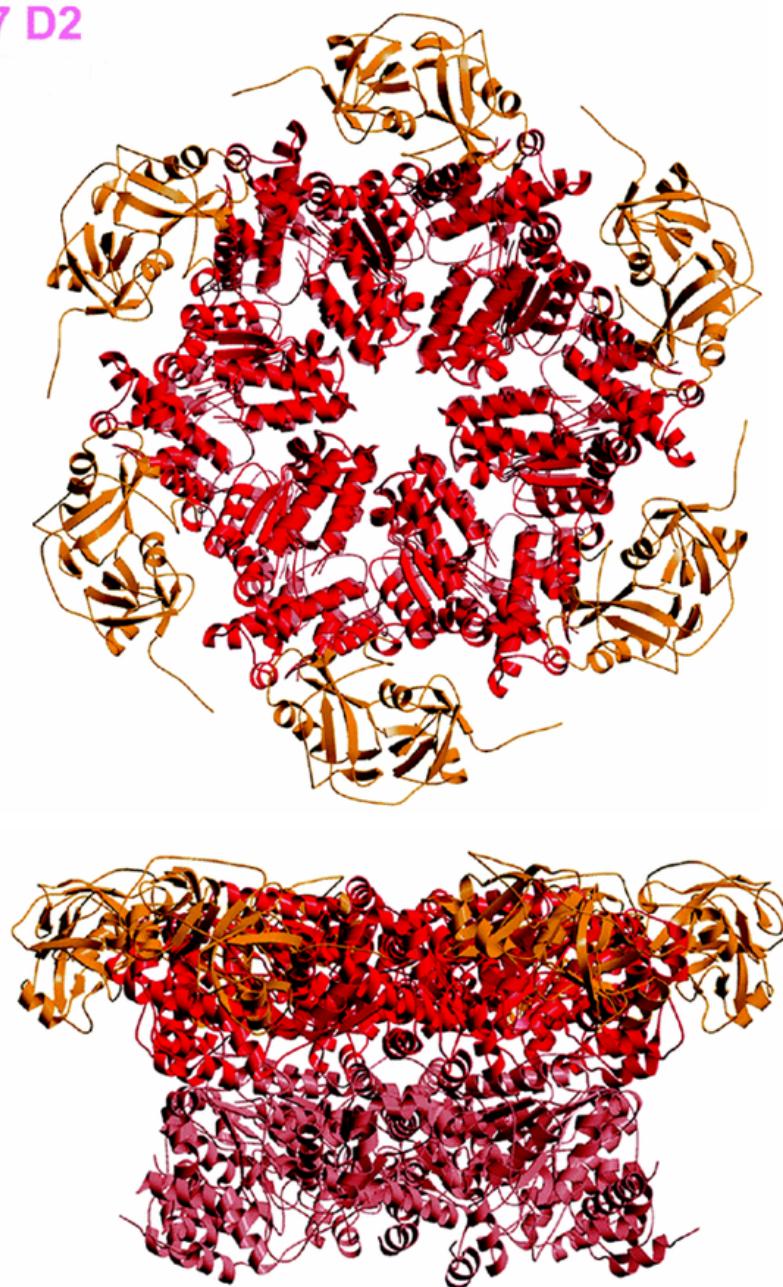

(Dreveny et al., 2004)

Supplementary Figure 1

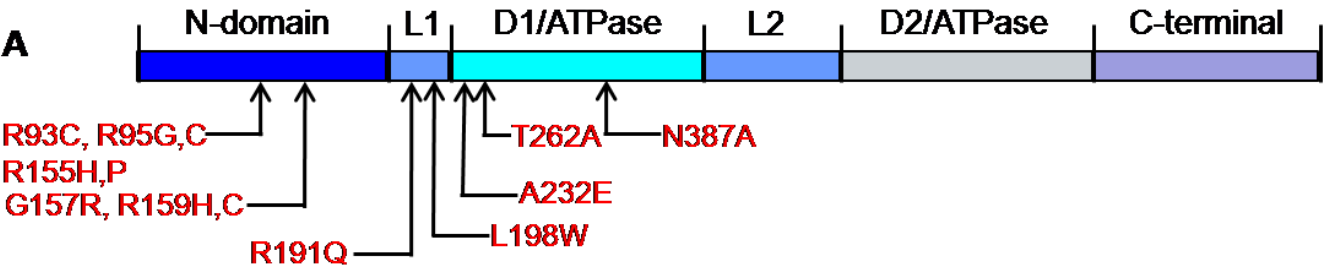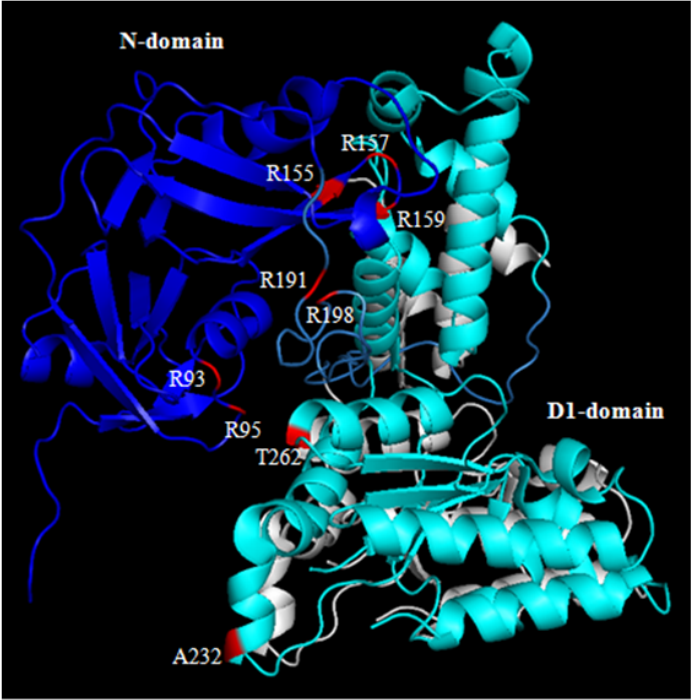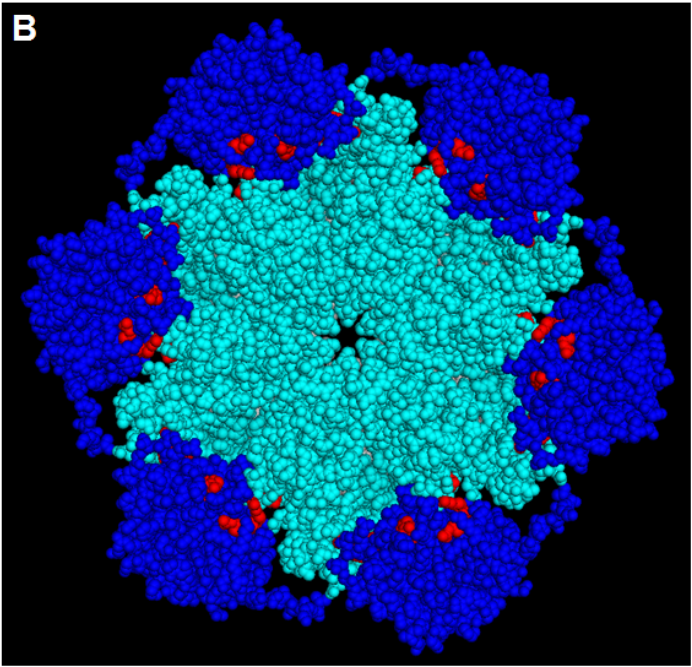

Supplementary Figure 2



|                 |                                                                 |
|-----------------|-----------------------------------------------------------------|
| Homo_sapiens    | MASGADSKGDDLSTAILKQKNRPNRLIVDEAINEDNSVSVLSQPKMDELQFRGDTVLLK     |
| Mus_musculus    | MASGADSKGDDLSTAILKQKNRPNRLIVDEAINEDNSVSVLSQPKMDELQFRGDTVLLK     |
| Drosophila_mela | --MADSKGEDLATAILKRNDRPNRLIVEEAQNDDNSVSVLSQAKMDELQFRGDTVILK      |
| consensus       | masgADSKGdDLsTAILKqKnRPnRLIVdEaINeDnSVVSLsQpKMDELQFRGDTVlLK     |
| Homo_sapiens    | GKKRRREAVCIVLSDDTCSDEKIRMNRVVRNRLRVRLGDVVISIQPCFDVKYGKRIHVLPID  |
| Mus_musculus    | GKKRRREAVCIVLSDDTCSDEKIRMNRVVRNRLRVRLGDVVISIQPCFDVKYGKRIHVLPID  |
| Drosophila_mela | GKKRRKETVCIVLSDDTCSDEKIRMNRVVRNRLRVRLSDVVSQSCFDVKYGKRVRILPID    |
| consensus       | GKkRrEaVCIVLSDDTCSDEKIRMNRVVRNRLrVrLgDVIsiQpCFDVKYgKRihvLPID    |
| Homo_sapiens    | DTVEGITGNLFEVYLKPYFLEAYRPIRKGDIFLVRGGMRRAVEFKVVEETDPSFYCIVAFDT  |
| Mus_musculus    | DTVEGITGNLFEVYLKPYFLEAYRPIRKGDIFLVRGGMRRAVEFKVVEETDPSFYCIVAFDT  |
| Drosophila_mela | ESTEGVTGNLFEIYXLPYFLEAYRPIHMGDNFTVRAAMRPIEFKVVLTDPEFYCIVAFET    |
| consensus       | dtvEGiTGNLFEvYlKpYfLEaYrPIrkGDiFlVRggMRaVeFKVVeTDpSFyCIVaPdT    |
| Homo_sapiens    | VIHCEGEPIKREDEEESLNEVGYYDDIGGCRKQLAQIKEMVELPLRHPALFKAIGVKPPRG   |
| Mus_musculus    | VIHCEGEPIKREDEEESLNEVGYYDDIGGCRKQLAQIKEMVELPLRHPALFKAIGVKPPRG   |
| Drosophila_mela | VIFCDGDPKREDEEESLNAVGYDDIGGCRKQLAQIKEMVELPLRHPSLFKAIGVKPPRG     |
| consensus       | ViHcEGePiKReDEEESLNeVGYYDDIGGCRKQLaQIKEMVELPLRHpALfKaIGvKPPRG   |
| Homo_sapiens    | ILLYGPPGTGKTLIARAVANETGAFFFLINGPEIMSKLAGESSENLKAFEEAEKNAPAI     |
| Mus_musculus    | ILLYGPPGTGKTLIARAVANETGAFFFLINGPEIMSKLAGESSENLKAFEEAEKNAPAI     |
| Drosophila_mela | ILMYGPPGTGKTLIARAVANETGAFFFLINGPEIMSKLAGESSENLKAFEEAEKNAPAI     |
| consensus       | ILlYgPPGTgKtLIARAVANeTGAFFfLIngPeImSkLaGeSeNLrKaFEeAEKnAPaI     |
| Homo_sapiens    | IFIDELDAIAPKREKTHGEVERRIVSQLLTMDGLKQRAHVIVMAATNRPN SIDPALRRF    |
| Mus_musculus    | IFIDELDAIAPKREKTHGEVERRIVSQLLTMDGLKQRAHVIVMAATNRPN SIDPALRRF    |
| Drosophila_mela | IFIDETDAIAPKRDKTHGEVERRIVSQLLTMDGMKKSSHITVMAATNRPN SIDPALRRF    |
| consensus       | IFIDeLDAIAPKReKThGEVeRRiVSQLLTMDGLKqraHvIVMAATNRPNsIDPaLRRF     |
| Homo_sapiens    | GRFDREV DIGIPDATGRLEILQIHTKNMKLADDVDLEQVANETHGHVGADLAALCSEAAAL  |
| Mus_musculus    | GRFDREV DIGIPDATGRLEILQIHTKNMKLADDVDLEQVANETHGHVGADLAALCSEAAAL  |
| Drosophila_mela | GRFDREIDIGIPDATGRLEVLRIHTKNMKLHDDVDLEQIAAESHGHVADLASLCSEAAAL    |
| consensus       | GRFDREvDIGIPDATGRLEiLqIHTKNMKLaDDVDLEQvAnEtHGHVGADLaALCSEAAAL   |
| Homo_sapiens    | QAIRKMDLIDLEDETIDAEMVNSLAVTMDDFRWALSQSNPSALRETVEVEPQVTWEDIG     |
| Mus_musculus    | QAIRKMDLIDLEDETIDAEMVNSLAVTMDDFRWALSQSNPSALRETVEVEPQVTWEDIG     |
| Drosophila_mela | QQIREKMDLIDLEDDKIDAENVASLAVTMENFRYAMTKSSPSALRETVEVEPNTWTWEDIG   |
| consensus       | QaIRkMDLiDLeDeTiDAeVmNSlAVTMddFRwAlsqSnPsaLREtVVeVpQvTWEDiG     |
| Homo_sapiens    | GLEDVKRELQELVQYPVEHPDKFLKFGMTPSKGVLFYGPFGCGKTLAKAIANECQANFI     |
| Mus_musculus    | GLEDVKRELQELVQYPVEHPDKFLKFGMTPSKGVLFYGPFGCGKTLAKAIANECQANFI     |
| Drosophila_mela | GLESVKRELQELVQYPVEHPDKFLKFGMQPSRGVLFYGPFGCGKTLAKAIANECQANFI     |
| consensus       | GLedVkrELQELVQYPVEHPDKFLKFGMtPskGVLFYGPFGCGKTLlAKAIANeCQANFI    |
| Homo_sapiens    | SIKGPELLTMWFGSEANVREIFDKARQAAPCVLFFDELDSIAKARGGNI GDGGGAADRV    |
| Mus_musculus    | SIKGPELLTMWFGSEANVREIFDKARQAAPCVLFFDELDSIAKARGGNI GDGGGAADRV    |
| Drosophila_mela | SVKGPELLTMWFGSEANVRDIFDKARS AAPCVLFFDELDSIAKARGGNI GDGGAADRV    |
| consensus       | SiKGPELLTMWfGSeANvReIFDKARqAaPCVlFFDeLDSIAKARGGNIgDgGGAADRV     |
| Homo_sapiens    | INQILTEMDGMSTKKNVFIIGATNRPD IIDPAILRPGRLDQLIYIFLPDEKSRVAILKAN   |
| Mus_musculus    | INQILTEMDGMSTKKNVFIIGATNRPD IIDPAILRPGRLDQLIYIFLPDEKSRVAILKAN   |
| Drosophila_mela | INQILTEMDGMGA KKNVFIIGATNRPD IIDPAILRPGRLDQLIYIFLPDDKSR EAILKAN |
| consensus       | INqILTEMDGMstKKNVfIIGATNRpDIIDPaILRPGRlDQlIyIFlPDeKSRvAILKAN    |
| Homo_sapiens    | LRKSPVAKDVDLEFLAKMTNGFSGADLTEICQRACKLAIRESEIEIRREERERQTNP-SA    |
| Mus_musculus    | LRKSPVAKDVDLEFLAKMTNGFSVADLTEICQRACKLAIRESEIEIRREERERQTNP-SA    |
| Drosophila_mela | LRKSPLAKEVDLT YIAKVTQGFSGADLTEICQRACKLAIRQAIEAIEIRREKERAENQNSA  |
| consensus       | LRKSPvAKdVDLeFlAKmTnGfSGADLTeICQRACKLAIResIEsEIRRErERqtNp-SA    |
| Homo_sapiens    | MEVEEDDPVPEIIRRDHFEEAMRFARRSVSDNDIRKYEMFAQTLQQSRGFGS-FRFFSGNQ   |
| Mus_musculus    | MEVEEDDPVPEIIRRDHFEEAMRFARRSVSDNDIRKYEMFAQTLQQSRGFGS-FRFFSGNQ   |
| Drosophila_mela | MDMDEDDPVPEITSAHFEEAMKFARRSVSDNDIRKYEMFAQTLQQSRGFGQNTFRFP----   |
| consensus       | MeVeEDDPVPEIrrdHFEEAMrFARRSVSDNDirKYEMfAQTLQQSRGFGs-FRFPsgnq    |
| Homo_sapiens    | GGAGPSQGS GGGGTGGSVYTEDNDDDLYG 100%                             |
| Mus_musculus    | GGAGPSQGS GGGGTGGSVYTEDNDDDLYG 99%                              |
| Drosophila_mela | GQTENTSGSCNNLPVNSPGDNGDDDLYS 84%                                |
| consensus       | GgaGpsqGSGggtggsvytednDDDLyG                                    |

Supplementary Figure 3

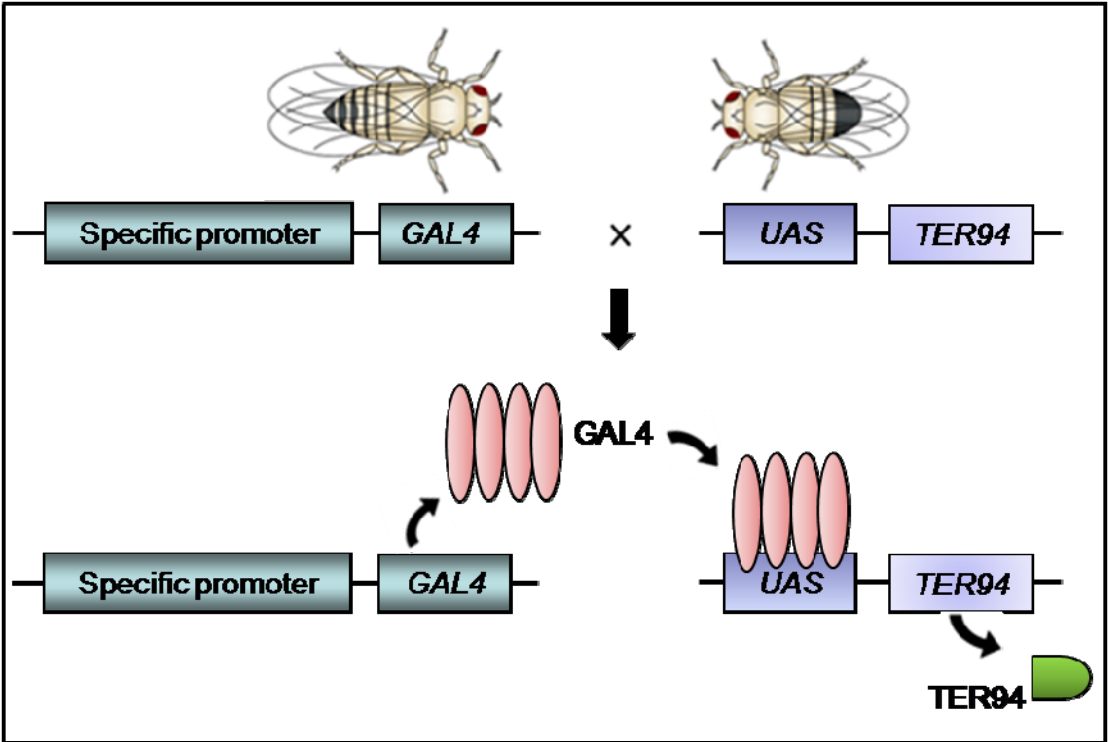

Supplementary Figure 4

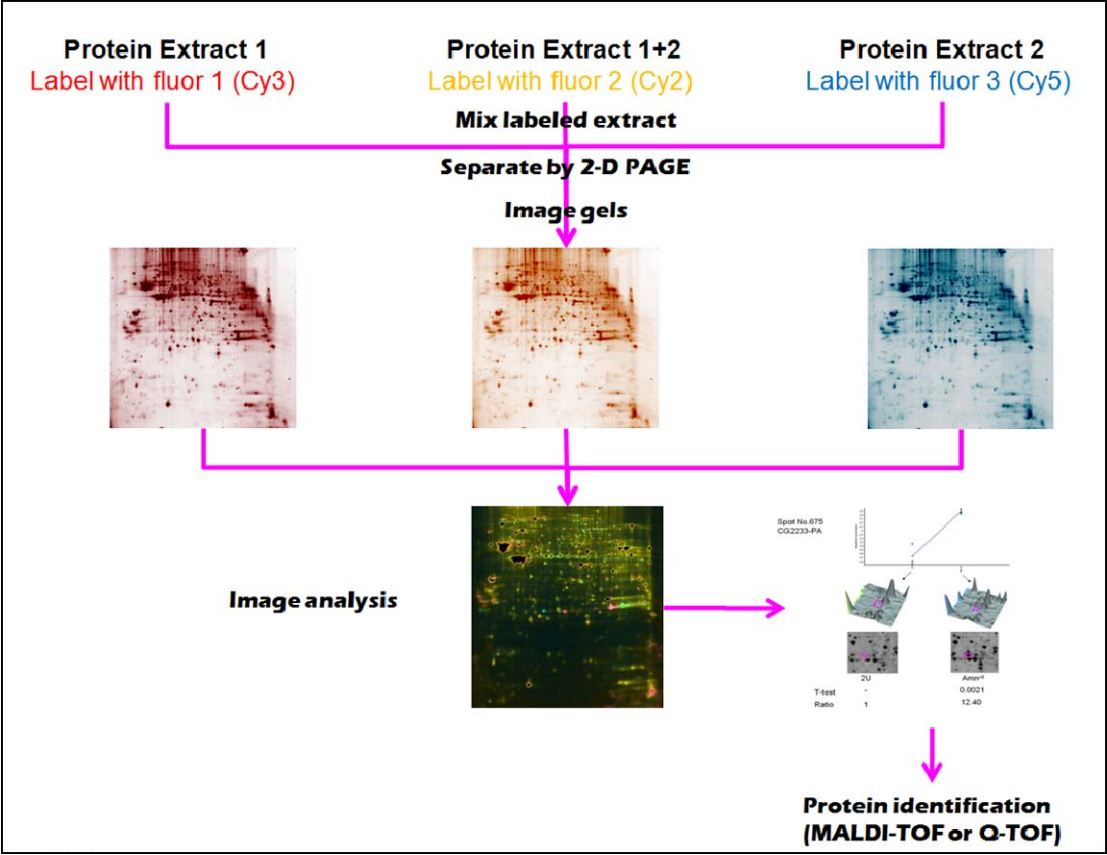

Supplementary Figure 5
